# Supplementary material for: Targeted massively parallel sequencing of angiosarcomas reveals frequent activation of the mitogen activated protein kinase pathway
Source: PubMed Central journal article supplement (PMC4742160; doi:10.18632/oncotarget.5936), 2015-09-30
Supplement: oncotarget-06-36041-s001.pdf [file oncotarget-06-36041-s001.pdf]

# Targeted massively parallel sequencing of angiosarcomas reveals frequent activation of the mitogen activated protein kinase pathway

## Supplementary Material

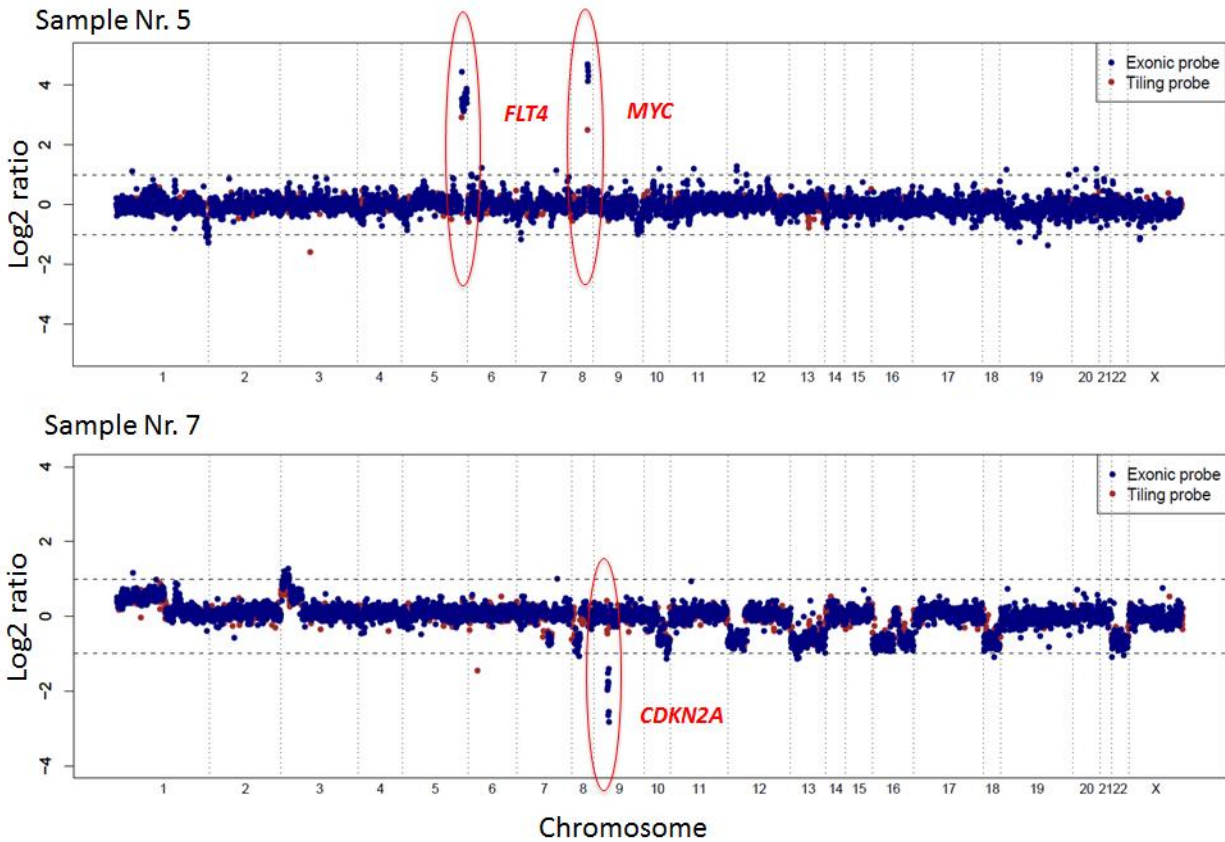

### Supplemental Figure 1. Representative individual copy number profiles.

Shown on top is sample 5, a tumor known to have arisen post-irradiation, demonstrating a high level *MYC* amplification (Chr.8q) as well as a concurrent *FLT4* amplification (Chr. 5q). The blot below shows sample 7, a tumor not associated with radiation, demonstrating a loss of *CDKN2A* (Chr. 9p).

Sample Nr. 2

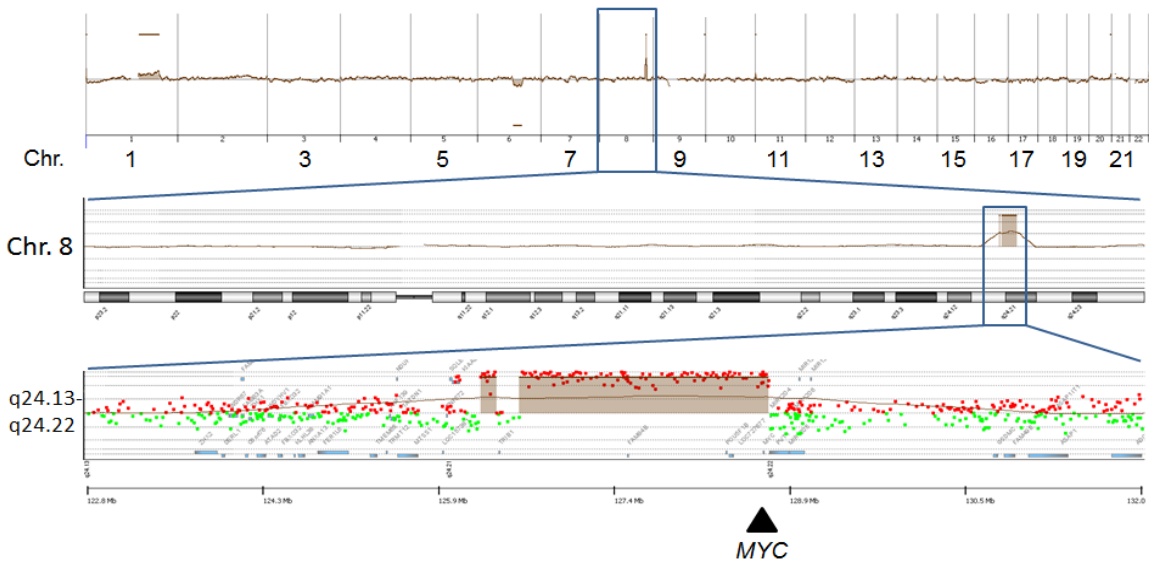

**Supplemental Figure 2. Detailed representation of a high level *MYC* amplification.**

Representative whole genome copy number alteration blot of sample 2 analyzed by Agilent 180k array. The tumor is known to have arisen post-irradiation and demonstrates a high level amplification on Chromosome 8q containing the *MYC* locus. A detailed view of the amplification involving the *MYC* locus is shown in the lower part of the figure.
